# Supplementary figures and images for: cTAGE5 mediates collagen secretion through interaction with TANGO1 at endoplasmic reticulum exit sites
Source: PubMed Central journal article supplement — Mol Biol Cell. 2011 Jul 1;22(13):2301–8. doi: 10.1091/mbc.E11-02-0143 (PMC3128532; doi:10.1091/mbc.e11-02-0143), 2011-07-01

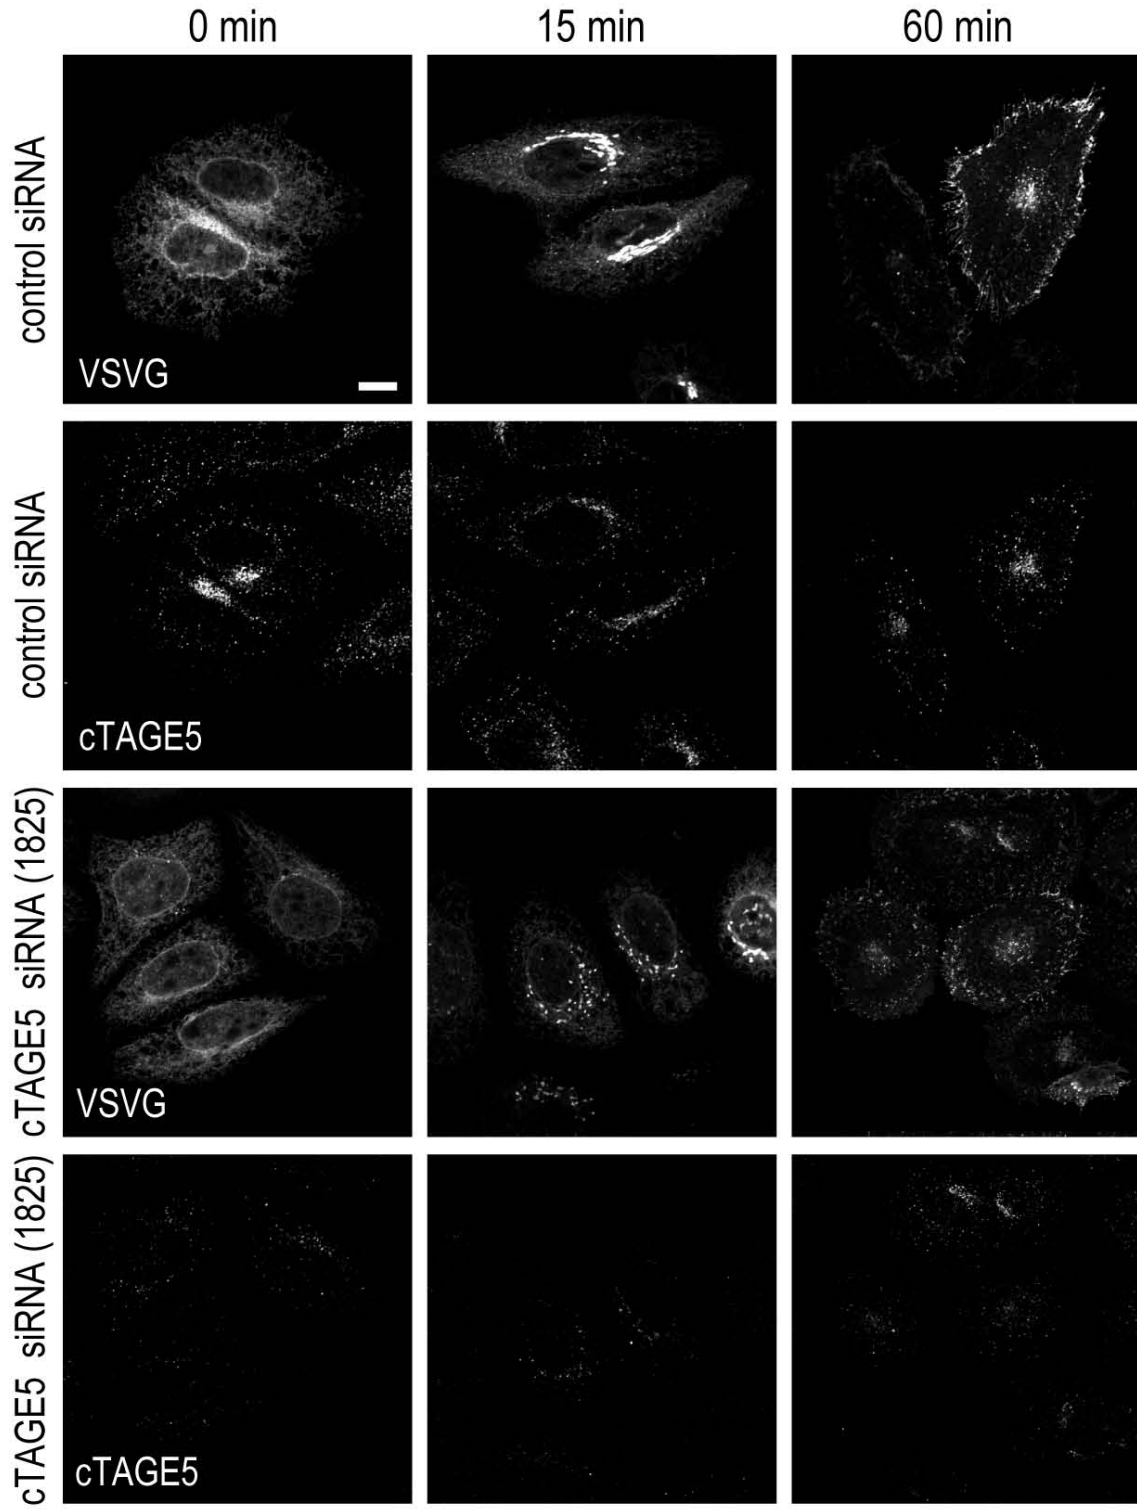

Fig. S1

A

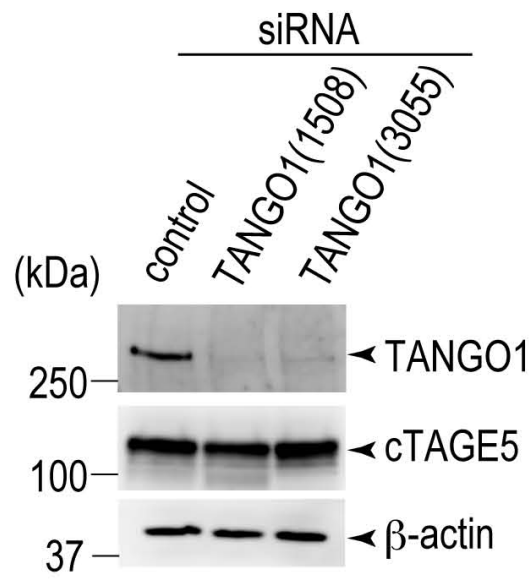

B

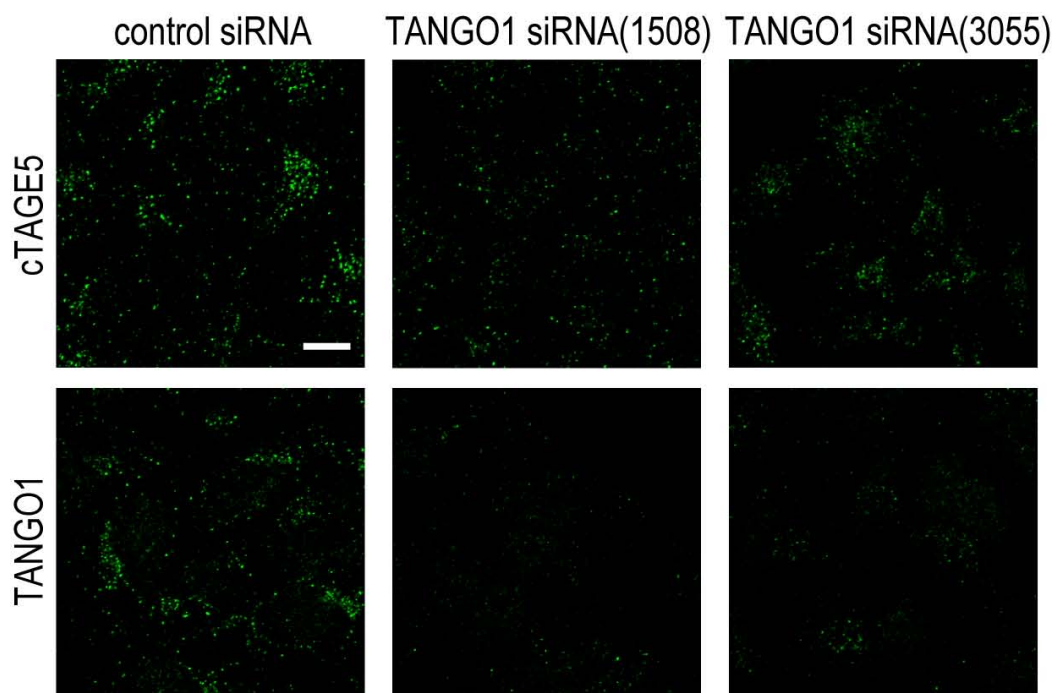

Fig. S2

Supplement: E11-02-0143_1.pdf [file E11-02-0143_1.pdf]
